# Supplementary material for: Asymmetric intermolecular Stetter reactions catalyzed by a novel triazolium derived N-heterocyclic carbene
Source: Royal Society of Chemistry journal article supplement (doi:10.1039/b809913h), 2008-01-01
Supplement: b809913h.pdf [file b809913h.pdf]

## **Asymmetric Intermolecular Stetter Reactions Catalyzed by a Novel Triazolium Derived *N*-Heterocyclic Carbene**

**Dieter Enders,\* Jianwei Han and Alexander Henseler**

**Electronic Supplementary Information**

## Supplementary Information

### Experimental Section

**General remarks:** All reactions were performed in oven-dried glassware under a slight positive pressure of argon. The employed aldehydes were freshly distilled or recrystallized, the 1,3-unsaturated ketones were prepared according to standard literature procedures.<sup>1</sup> Other starting materials and reagents were purchased from commercial suppliers and used without further purification. All solvents were dried by conventional methods.<sup>2</sup> Toluene and THF were freshly distilled from Na/Pb alloy under argon. Preparative column chromatography: Merck silica gel 60, particle size 0.040–0.063 mm (230–240 mesh, flash). Analytical TLC: silica gel 60, F254 plates from Merck, Darmstadt. Optical rotation values were measured on a PerkinElmer P241 polarimeter. IR spectra were taken on a PerkinElmer FT/IR 1760 spectrophotometer. <sup>1</sup>H-NMR and <sup>13</sup>C-NMR spectra were determined on a Gemini 300 or a Varian Inova 400 spectrometer and all measurements were performed with tetramethylsilane as internal standard. Chemical shifts for <sup>1</sup>H-NMR and <sup>13</sup>C-NMR are reported in parts per million (ppm), with coupling constants reported in Hertz (Hz). The following abbreviations are used for spin multiplicity: s = singlet, d = doublet, dd = double doublet, t = triplet, m = multiplet. Mass spectra were acquired on a Finnigan SSQ 7000 spectrometer (CI 100 eV; EI 70 eV). Microanalyses were obtained with a Vario EL element analyzer. Melting points were determined with a Tottoli melting point apparatus and are uncorrected. Analytical HPLC was performed on Hewlett-Packard 1100 Series chromatographs using chiral stationary phases (Daicel Chiralcel OD, Daicel Chiralpak AD, VWR (s,s)-Whelk O1). Reaction control via gas chromatography was performed on a Varian CP-3800 (CP-Sil 8 CB) by using theoretical response factors for the determination of conversion.<sup>3</sup>

**(S)-5-((tert-Butyldiphenylsilyloxy)methyl)pyrrolidin-2-one (19):**

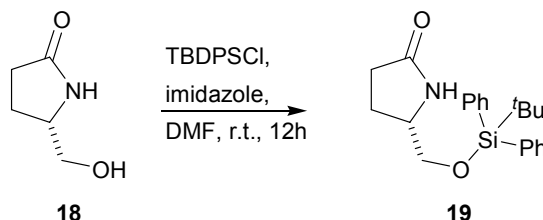

Imidazole (355 mg, 5.21 mmol) and tert-butyldiphenylsilylchloride (TBDPSCI) (1.35 mL, 5.21 mmol) were sequentially added to a solution of pyrrolidinone **18** (0.50 g, 4.34 mmol) in dry DMF (10 mL), at room temperature. After stirring for 18 h, the reaction mixture was quenched by addition of saturated aqueous NH<sub>4</sub>Cl (30 mL) and extracted with ethyl acetate (2 × 15 mL). The combined organic layers were washed with water (2 × 15 mL) and dried over MgSO<sub>4</sub>, filtered and concentrated under vacuum. The crude product was then purified by silica gel flash chromatography (EtOAc) to give (S)-5-((tert-butyl-diphenylsilyloxy)methyl)pyrrolidin-2-one (**19**) (1.52g, 99%) as a colorless oil. The analytical data were in accordance with those reported in the literature.<sup>4</sup>

$[\alpha]_D^{23} = -16.1$  (c 1.01, CHCl<sub>3</sub>); <sup>1</sup>H-NMR (300MHz, CDCl<sub>3</sub>):  $\delta = 1.03$  (s, 9H), 1.74 (m, 1H), 2.11 (m, 1H), 2.29 (m, 2H), 3.55 (m, 2H), 3.77 (m, 1H), 6.39 (s, 1H), 7.37 (m, 6H), 7.62 (m, 4H); <sup>13</sup>C-NMR (75MHz, CDCl<sub>3</sub>):  $\delta = 19.1, 22.7, 26.6, 29.7, 55.5, 67.2, 127.7, 129.7, 132.9, 135.4, 178.1$ .

**(S)-2-Benzyl-5-((tert-butyl-diphenylsilyloxy)methyl)-6,7-dihydro-5H-pyrrolo[2,1-c][1,2,4]triazol-2-ium tetrafluoroborate (9):**

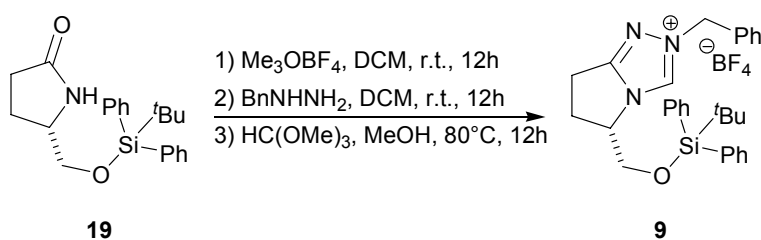

A 10 mL round bottomed flask was charged with the lactam **19** (0.35 g, 1.00 mmol) in absolute  $\text{CH}_2\text{Cl}_2$  (10 mL). Trimethyloxonium tetrafluoroborate (0.16 g, 1.10 mmol) was added and the reaction mixture stirred for 12 hours at room temperature. Afterwards benzylhydrazine (0.11 mL, 1.10 mmol) was added and the solution was again stirred for 12 hours. The solvent was removed in vacuo and the residue was used without further purification. Trimethyl orthoformate (10 mL) was added and the reaction mixture was refluxing at  $80^\circ\text{C}$  for 12 hours. The solvent was removed in vacuo and the product was precipitated from ethyl acetate. Recrystallization from hot ethyl acetate afforded (*S*)-2-benzyl-5-((tert-butyl-diphenylsilyloxy)methyl)-6,7-dihydro-5H-pyrrolo[2,1-*c*][1,2,4]triazol-2-ium-tetrafluoroborate (**9**) (0.47g, 85%) as analytical pure colorless solid.

mp:  $159^\circ\text{C}$ ;  $[\alpha]_{\text{D}}^{23} = -3.8$  (c 1.01,  $\text{CHCl}_3$ ); IR(KBr):  $\nu$  ( $\text{cm}^{-1}$ ) = 3397, 3137, 3097, 3044, 2955, 2933, 2886, 2859, 2371, 2346, 1971, 1902, 1834, 1684, 1523, 1499, 1465, 1429, 1389, 1288, 862, 824, 786, 646, 614, 558;  $^1\text{H-NMR}$  (300MHz,  $\text{CDCl}_3$ ): 0.72 (s, 9H), 2.54 (m, 1H), 2.92 (m, 1H), 3.11 (m, 2H), 3.78 (dd,  $J = 3.6\text{Hz}$ , 11.8Hz, 1H), 4.14 (dd,  $J = 3.6\text{Hz}$ , 11.8Hz, 1H), 5.01 (m, 1H), 5.30 (d,  $J = 14.2\text{Hz}$ , 1H), 5.39 (d,  $J = 14.2\text{Hz}$ , 1H), 7.36 (m, 7 H), 7.44 (m, 8H), 9.43 (s, 1H).  $^{13}\text{C-NMR}$  (75MHz,  $\text{CDCl}_3$ ): 19.14, 22.22, 26.77, 29.79, 57.06, 61.61, 64.67, 128.00, 128.12, 129.22, 129.36, 129.62, 130.21, 130.31, 131.52, 131.75, 135.24, 135.32, 138.50, 162.55. MS (ESI):  $m/z$  (+) = 468.2 (100,  $\text{M}^+$ ); 382.3 (5).  $m/z$  (-) = 87.3 (100,  $\text{BF}_4^-$ ); Anal. Calcd for  $\text{C}_{29}\text{H}_{34}\text{N}_3\text{OSiBF}_4$ : C 62.70%, H 6.17%; N 7.56%; Found: C 63.01%; H 6.57%; N 7.54%.

**General procedure for the asymmetric intermolecular Stetter reaction:**

In a dry, argon-flushed Schlenk tube the precatalyst **9** (27 mg, 0.05 mmol 10 mol%), dry  $\text{Cs}_2\text{CO}_3$  (16 mg, 0.05 mmol) and chalcone **2** (104 mg, 0.5 mmol) were dissolved in absolute THF (1 mL). The reaction mixture was cooled to  $0^\circ\text{C}$  and then benzaldehyde **1** (64 mg,

0.60 mmol) was added dropwise. After stirring for 8h, the reaction mixture was directly purified by flash chromatography on silica gel (pentane / diethylether = 9:1) to yield (*R*)-1,2,4-triphenylbutane-1,4-dione **12a** (102mg, 65%) as colorless solid. Recrystallization from diethylether afforded the 1,4-diketone **12a** (62mg, 40%) enantiomerically pure as colorless needles. The analytical data were in accordance with those reported in the literature.<sup>5</sup>

**(*R*)-1,2,4-Triphenylbutane-1,4-dione (12a)**,  $[\alpha]_{\text{D}}^{23} = -291.1$  (c 1.01, CHCl<sub>3</sub>);  
<sup>1</sup>H-NMR (300MHz, CDCl<sub>3</sub>): 3.22 (dd, *J* = 18.3Hz, 3.8Hz, 1H), 4.14 (dd, *J* = 18.3 Hz, 10.2Hz, 1H), 5.24 (dd, *J* = 10.2Hz, 3.8Hz, 1H), 7.12-7.64 (m, 12H), 7.90-8.22 (m, 3H); <sup>13</sup>C-NMR (75MHz, CDCl<sub>3</sub>): 43.8, 48.6, 127.3, 128.0, 128.1, 128.4, 128.5, 128.6, 128.8, 129.1, 129.9, 132.8, 133.2, 136.3, 138.5, 197.9, 198.8.

**(*R*)-2,4-Diphenyl-1-*p*-tolylbutane-1,4-dione (12b)**,  $[\alpha]_{\text{D}}^{23} = -251.4$  (c 1.01, CHCl<sub>3</sub>);  
<sup>1</sup>H-NMR (300MHz, CDCl<sub>3</sub>): 2.26 (s, 3H), 3.20 (dd, *J* = 17.7Hz, 3.7Hz, 1H), 4.12 (dd, *J* = 17.7Hz, 9.9Hz, 1H), 5.23 (dd, *J* = 9.9Hz, 3.7Hz, 1H), 7.11-7.56 (m, 10H), 7.82-8.04 (m, 4H);  
<sup>13</sup>C-NMR (75MHz, CDCl<sub>3</sub>): 21.6, 43.8, 48.6, 125.4, 127.3, 128.2, 128.3, 128.6, 129.1, 129.2, 129.3, 129.6, 129.8, 130.6, 131.1, 132.8, 133.2, 133.9, 136.6, 138.9, 143.7, 144.9, 198.1, 198.5.

**(*R*)-2,4-Diphenyl-1-*m*-tolylbutane-1,4-dione (12c)**,  $[\alpha]_{\text{D}}^{23} = -334.1$  (c 1.01, CHCl<sub>3</sub>);  
<sup>1</sup>H-NMR (300MHz, CDCl<sub>3</sub>): 2.28 (s, 3H), 3.22 (dd, *J* = 17.7, 3.9Hz, 1H), 4.13 (dd, *J* = 17.7Hz, 10.2Hz, 1H), 5.25 (dd, *J* = 10.2Hz, 3.9Hz, 1H), 7.12-7.54 (m, 10H), 7.74-7.78 (m, 2H), 7.88-7.94 (m, 2H); <sup>13</sup>C-NMR (75MHz, CDCl<sub>3</sub>): 21.4, 43.9, 48.7, 126.2, 127.3, 128.2, 128.3, 128.4, 128.6, 129.0, 129.2, 129.4, 133.2, 133.7, 134.1, 136.5, 138.3, 138.7, 198.1, 199.1.

**(R)-1-(4-Chlorophenyl)-2,4-diphenylbutane-1,4-dione (12d)**,  $^1\text{H-NMR}$  (400MHz,  $\text{CDCl}_3$ ): 3.22 (dd,  $J=18.2\text{Hz}$ ,  $3.6\text{Hz}$ , 1H), 4.13 (dd,  $J=18.2\text{Hz}$ ,  $10.2\text{Hz}$ , 1H), 5.17 (dd,  $J=10.2\text{Hz}$ ,  $3.6\text{Hz}$ , 1H), 7.12-7.50 (m, 10H), 7.86-7.92 (m, 4H);  $^{13}\text{C NMR}$  (100MHz,  $\text{CDCl}_3$ ): 44.0, 48.9, 127.5, 128.1, 128.6, 128.8, 129.3, 130.3, 131.8, 133.3, 134.7, 136.3, 138.2, 139.3, 197.6, 197.9.

**(R)-1-(4-Bromophenyl)-2,4-diphenylbutane-1,4-dione (12e)**,  $^1\text{H-NMR}$  (400MHz,  $\text{CDCl}_3$ ): 3.22 (dd,  $J=18.2\text{Hz}$ ,  $3.6\text{Hz}$ , 1H), 4.13 (dd,  $J=18.2\text{Hz}$ ,  $10.5\text{Hz}$ , 1H), 5.17 (dd,  $J=10.5\text{Hz}$ ,  $3.6\text{Hz}$ , 1H), 7.12-7.58 (m, 10H), 7.80-7.84 (m, 2H), 7.88-7.93 (m, 2H);  $^{13}\text{C NMR}$  (100MHz,  $\text{CDCl}_3$ ): 43.9, 48.8, 127.5, 128.1, 128.6, 129.3, 130.4, 131.8, 133.3, 135.2, 136.3, 138.2, 197.8, 197.9.

**(R)-1-(Naphthalen-2-yl)-2,4-diphenylbutane-1,4-dione (12f)**,  $[\alpha]_{\text{D}}^{23} = -106.7$  (c 1.01,  $\text{CHCl}_3$ );  $^1\text{H-NMR}$  (400MHz,  $\text{CDCl}_3$ ): 3.26 (dd,  $J=18.1\text{Hz}$ ,  $3.8\text{Hz}$ , 1H), 4.19 (dd,  $J=18.1\text{Hz}$ ,  $9.8\text{Hz}$ , 1H), 5.40 (dd,  $J=9.8\text{Hz}$ ,  $3.8\text{Hz}$ , 1H), 7.69-7.50 (m, 10H), 7.65-8.05 (m, 6H), 8.51 (s, 1H);  $^{13}\text{C-NMR}$  (75MHz,  $\text{CDCl}_3$ ): 44.0, 48.9, 124.6, 126.5, 127.3, 127.6, 128.1, 128.2, 128.3, 128.4, 128.5, 129.2, 129.7, 130.7, 132.5, 133.3, 133.8, 135.5, 136.5, 138.7, 198.0, 198.8.

**(R)-1-(Furan-2-yl)-2,4-diphenylbutane-1,4-dione (12h)**,  $^1\text{H-NMR}$  (300MHz,  $\text{CDCl}_3$ ): 3.24 (dd,  $J=18.0\text{Hz}$ ,  $3.8\text{Hz}$ , 1H), 4.09 (dd,  $J=18.0\text{Hz}$ ,  $10.1\text{Hz}$ , 1H), 5.04 (dd,  $J=10.1\text{Hz}$ ,  $3.8\text{Hz}$ , 1H), 6.38 (m, 1H), 7.10-7.50 (m, 10H), 7.80-7.98 (m, 2H);  $^{13}\text{C-NMR}$  (75MHz,  $\text{CDCl}_3$ ): 42.8, 48.7, 112.3, 118.0, 127.1, 127.5, 128.2, 128.3, 128.4, 128.6, 128.8, 129.0, 133.3, 136.4, 138.3, 146.5, 187.7, 197.8.

**(R)-2-(4-Chlorophenyl)-1,4-diphenylbutane-1,4-dione (12i)**,  $[\alpha]_{\text{D}}^{23} = -220.0$  (c 1.01,  $\text{CHCl}_3$ );  $^1\text{H-NMR}$  (400MHz,  $\text{CDCl}_3$ ): 3.22 (dd,  $J = 18.2\text{Hz}$ ,  $3.8\text{Hz}$ , 1H), 4.08 (dd,  $J = 18.2\text{Hz}$ ,  $9.8\text{Hz}$ , 1H), 5.23 (dd,  $J = 9.8\text{Hz}$ ,  $3.8\text{Hz}$ , 1H), 7.14-7.52 (m, 10H), 7.87-7.96 (m, 4H);  $^{13}\text{C-NMR}$  (100MHz,  $\text{CDCl}_3$ ): 43.8, 48.0, 128.1, 128.4, 128.5, 128.6, 128.8, 129.1, 129.3, 129.6, 129.9, 133.1, 133.3, 133.5, 136.2, 136.3, 137.1, 197.6, 198.5.

**(R)-1,4-Diphenyl-2-p-tolylbutane-1,4-dione (12j)**,  $^1\text{H-NMR}$  (300MHz,  $\text{CDCl}_3$ ): 2.21(s, 3H), 3.20 (dd,  $J = 18.1\text{Hz}$ ,  $3.7\text{Hz}$ , 1H), 4.11 (dd,  $J = 18.1\text{Hz}$ ,  $10.1\text{Hz}$ , 1H), 5.21 (dd,  $J = 10.1\text{Hz}$ ,  $3.7\text{Hz}$ , 1H), 7.04-7.51 (m, 10H), 7.88-7.97 (m, 4H);  $^{13}\text{C-NMR}$  (75MHz,  $\text{CDCl}_3$ ): 21.0, 43.9, 48.3, 128.1, 128.2, 128.5, 128.6, 128.9, 129.9, 132.8, 133.2, 135.6, 136.5, 137.1, 198.2, 199.1.

AK Enders - Analytische HPLC

Sample Name: han 23037  
 Data file: F:\GONZO\HAN\23037W.D  
 Sample Info: Laufmittel: n-Heptan/EtOH 95:5;  
 Probe im LM gelöst

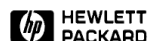

Säule: WHELK.M  
 Säuleninfo: (250x4,6)mm  
 Operator: Analytik Labor AKEN

Injektion Time: 11:55:12  
 Injektion Date: 27.03.2007

Instrument Conditions: At Start At Stop  
 Temperature in °C: 30.0 30.0  
 Pressure in bar: 29.6 30.2  
 Flow in ml/min: 0.7 0.7

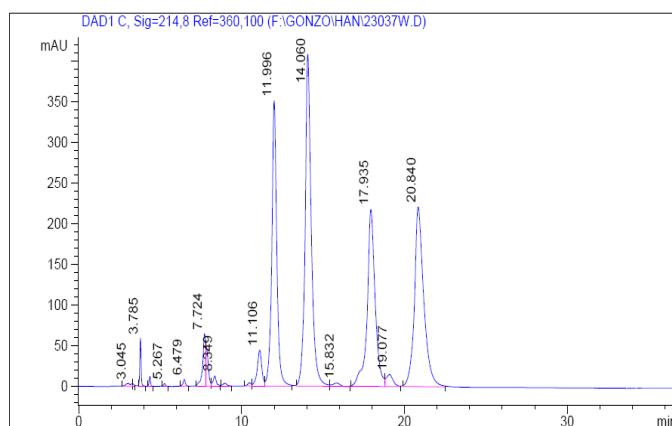

| #     | Ret. Time (min) | Width | Height (mAU) | Area (mAU*s) | Area % |
|-------|-----------------|-------|--------------|--------------|--------|
| 1     | 3.04            | 0.28  | 3.43         | 75.31        | 0.20   |
| 2     | 3.34            | 0.10  | 2.69         | 18.51        | 0.05   |
| 3     | 3.78            | 0.09  | 58.74        | 319.10       | 0.84   |
| 4     | 4.36            | 0.09  | 12.01        | 71.57        | 0.19   |
| 5     | 5.27            | 0.13  | 3.29         | 26.70        | 0.07   |
| 6     | 6.48            | 0.16  | 8.15         | 86.12        | 0.23   |
| 7     | 7.72            | 0.19  | 64.61        | 830.01       | 2.18   |
| 8     | 7.89            | 0.17  | 40.85        | 457.79       | 1.20   |
| 9     | 8.35            | 0.20  | 12.53        | 175.41       | 0.46   |
| 10    | 8.97            | 0.27  | 3.45         | 62.41        | 0.16   |
| 11    | 10.48           | 0.23  | 3.97         | 60.65        | 0.16   |
| 12    | 11.11           | 0.29  | 44.11        | 862.81       | 2.27   |
| 13    | 12.00           | 0.31  | 350.90       | 7503.57      | 19.70  |
| 14    | 14.06           | 0.38  | 408.09       | 10702.72     | 28.10  |
| 15    | 15.83           | 0.47  | 4.10         | 122.56       | 0.32   |
| 16    | 17.94           | 0.49  | 217.87       | 7438.01      | 19.53  |
| 17    | 19.08           | 0.44  | 14.79        | 440.29       | 1.16   |
| 18    | 20.84           | 0.57  | 221.28       | 8832.91      | 23.19  |
| Total |                 |       |              | 38086.45     | 100.00 |

Figure 1 HPLC of 1,2,4-triphenylbutane-1,4-dione (*rac*-12a).



AK Enders - Analytische HPLC

Sample Name: HAN HR1  
Data file: D:\GONZO\HAN\HR1W.D  
Sample Info: Laufmittel: n-Heptan/ETOH 95:5;  
Probe im LM gelöst

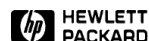

Säule: WHELK.M  
Säuleninfo: (250x4,6)mm  
Operator: Analytik Labor AKEN

->

Injektion Time: 15:38:36  
Injektion Date: 27.03.2008

Instrument Conditions: At Start At Stop  
Temperature in °C: 30.0°C 30.0°C  
Pressure in bar: 32.5 32.7  
Flow in ml/min: 0.7 0.7

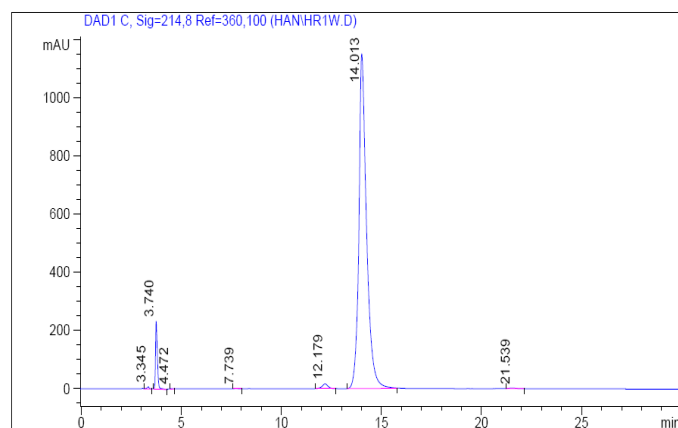

| #     | Ret. Time (min) | Width | Height (mAU) | Area (mAU*s) | Area % |
|-------|-----------------|-------|--------------|--------------|--------|
| 1     | 3.35            | 0.12  | 7.83         | 67.06        | 0.20   |
| 2     | 3.74            | 0.10  | 233.36       | 1507.41      | 4.60   |
| 3     | 4.47            | 0.14  | 2.15         | 21.49        | 0.07   |
| 4     | 7.74            | 0.17  | 1.35         | 15.36        | 0.05   |
| 5     | 12.18           | 0.32  | 16.75        | 363.52       | 1.11   |
| 6     | 14.01           | 0.38  | 1149.49      | 30726.48     | 93.79  |
| 7     | 21.54           | 0.37  | 1.97         | 59.59        | 0.18   |
| Total |                 |       |              | 32760.92     | 100.00 |

Figure 2 HPLC of (*R*)-1,2,4-triphenylbutane-1,4-dione (**12a**).

AK Enders - Analytische HPLC

Sample Name: Han 361  
 Data file: F:\BERT\HAN\361RAIA.D  
 Sample Info: Laufmittel:n-Heptan/IP 9:1;  
 Probe im LM gelöst

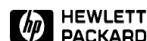

Säule: DRICELIA.M  
 Säuleninfo: (250 x 4.6)mm 10µ

Operator: Analytik Labor AKEN

Injektion Time: 12:36:30  
 Injektion Date: 25.01.2008

Instrument Conditions: At Start At Stop

Temperature in °C: 30.0 30.0  
 Pressure in bar: 23.7 23.6  
 Flow in ml/min: 0.5 0.5

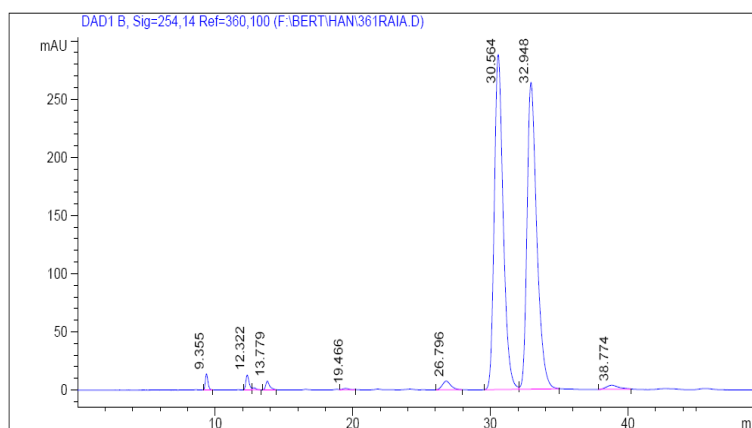

| #     | Ret. Time (min) | Width | Height (mAU) | Area (mAU*s) | Area % |
|-------|-----------------|-------|--------------|--------------|--------|
| 1     | 9.36            | 0.20  | 13.93        | 183.92       | 0.68   |
| 2     | 12.32           | 0.25  | 12.73        | 208.52       | 0.77   |
| 3     | 12.80           | 0.24  | 1.77         | 31.48        | 0.12   |
| 4     | 13.78           | 0.31  | 7.46         | 153.77       | 0.57   |
| 5     | 19.47           | 0.39  | 1.21         | 39.45        | 0.15   |
| 6     | 26.80           | 0.52  | 7.52         | 322.95       | 1.19   |
| 7     | 30.56           | 0.68  | 288.12       | 12950.48     | 47.78  |
| 8     | 32.95           | 0.75  | 263.79       | 12985.14     | 47.91  |
| 9     | 38.77           | 0.77  | 3.52         | 229.05       | 0.85   |
| Total |                 |       |              | 27104.76     | 100.00 |

Figure 3 HPLC of 2,4-diphenyl-1-*p*-tolylbutane-1,4-dione (*rac*-12b).

AK Enders - Analytische HPLC

Sample Name: Han HR 2  
 Data file: E:\BERT\HAN\HR2IA.D  
 Sample Info: Laufmittel:n-Heptan/IP 9:1;  
 Probe im LM gelöst

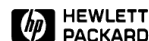

Säule: DAICELIA.M  
 Säuleninfo: (250 x 4.6)mm 10µ

Operator: Analytik Labor AKEN

Injektion Time: 11:51:11  
 Injektion Date: 31.03.2008

Instrument Conditions: At Start At Stop

Temperature in °C: 30.0 30.0  
 Pressure in bar: 24.8 25.2  
 Flow in ml/min: 0.5 0.5

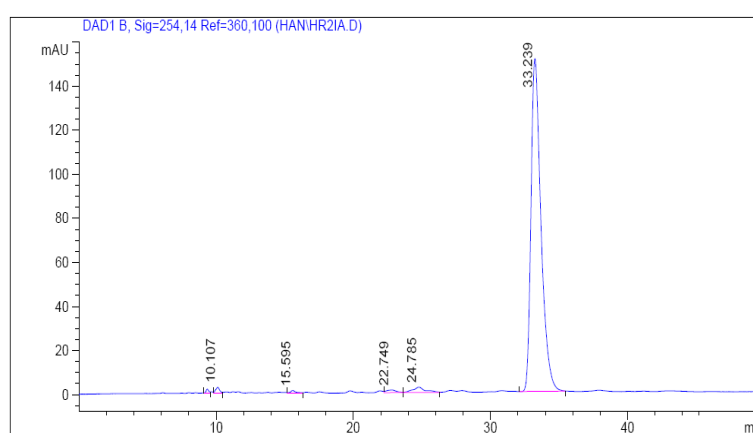

| #     | Ret. Time (min) | Width | Height (mAU) | Area (mAU*s) | Area % |
|-------|-----------------|-------|--------------|--------------|--------|
| 1     | 9.34            | 0.19  | 1.82         | 23.88        | 0.30   |
| 2     | 10.11           | 0.34  | 2.61         | 53.02        | 0.67   |
| 3     | 15.59           | 0.34  | 1.15         | 31.06        | 0.39   |
| 4     | 22.75           | 0.60  | 1.23         | 62.45        | 0.78   |
| 5     | 24.79           | 0.77  | 2.47         | 158.93       | 2.00   |
| 6     | 33.24           | 0.76  | 151.02       | 7627.03      | 95.86  |
| Total |                 |       |              | 7956.37      | 100.00 |

Figure 4 HPLC of (*R*)-2,4-diphenyl-1-*p*-tolylbutane-1,4-dione (**12b**).

AK Enders - Analytische HPLC

Sample Name: H 385 rac  
 Data file: D:\GONZO\HAN\385RW.D  
 Sample Info: Laufmittel: n-Heptan/IP 9:1;  
 Probe im LM/DCM gelöst

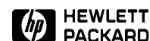

Säule: WHELK.M  
 Säuleninfo: (250x4,6)mm  
 Operator: Analytik Labor AKEN

Injektion Time: 08:49:39  
 Injektion Date: 20.02.2008

Instrument Conditions: At Start At Stop  
 Temperature in °C: 30.0 °C 30.0 °C  
 Pressure in bar: 53.7 54.0  
 Flow in ml/min: 1.0 1.0

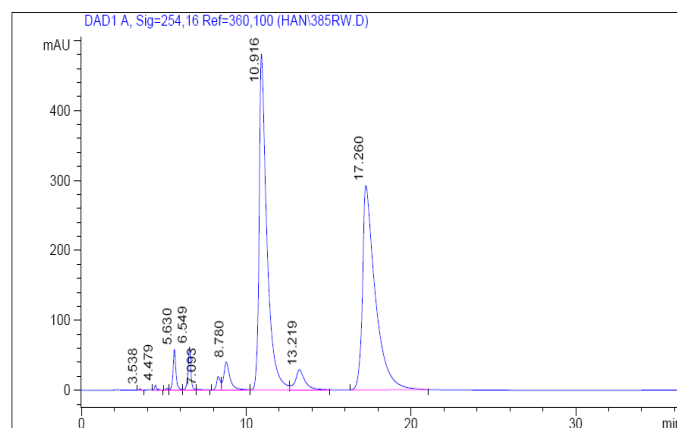

| #     | Ret. Time (min) | Width | Height (mAU) | Area (mAU*s) | Area % |
|-------|-----------------|-------|--------------|--------------|--------|
| 1     | 3.54            | 0.14  | 2.12         | 19.63        | 0.06   |
| 2     | 4.48            | 0.14  | 7.35         | 73.79        | 0.21   |
| 3     | 5.18            | 0.15  | 2.76         | 28.33        | 0.08   |
| 4     | 5.63            | 0.18  | 58.28        | 720.26       | 2.02   |
| 5     | 6.55            | 0.17  | 61.77        | 731.07       | 2.05   |
| 6     | 7.09            | 0.40  | 1.24         | 34.11        | 0.10   |
| 7     | 8.29            | 0.24  | 19.32        | 316.31       | 0.89   |
| 8     | 8.78            | 0.38  | 40.25        | 1069.57      | 3.00   |
| 9     | 10.92           | 0.46  | 480.50       | 15670.46     | 43.98  |
| 10    | 13.22           | 0.59  | 28.83        | 1190.05      | 3.34   |
| 11    | 17.26           | 0.76  | 292.06       | 15779.55     | 44.28  |
| Total |                 |       |              | 35633.12     | 100.00 |

Figure 5 HPLC of 2,4-diphenyl-1-*m*-tolylbutane-1,4-dione (*rac*-12c).

AK Enders - Analytische HPLC

Sample Name: Han HR 3  
Data file: D:\GONZO\HAN\HR3W.D  
Sample Info: Laufmittel: n-Heptan/IP 9:1;  
Probe im LM gelöst

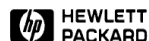

->

Säule: WHELK.M  
Säuleninfo: (250x4,6)mm  
Operator: Analytik Labor AKEN

Injektion Time: 14:08:57  
Injektion Date: 31.03.2008

Instrument Conditions: At Start At Stop  
Temperature in °C: 30.0 °C 30.0 °C  
Pressure in bar: 49.0 49.6  
Flow in ml/min: 1.0 1.0

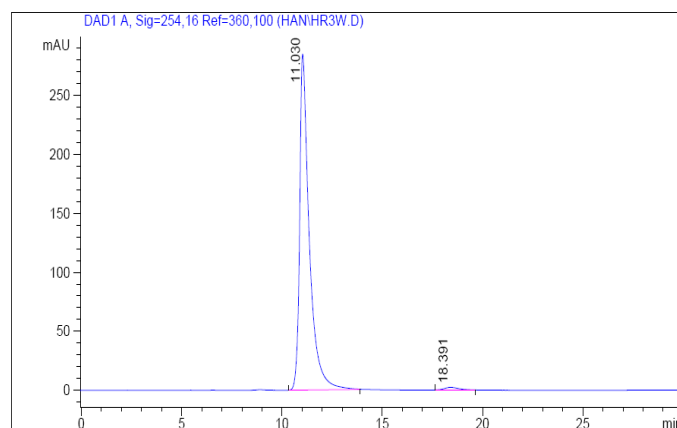

| #     | Ret. Time (min) | Width | Height (mAU) | Area (mAU*s) | Area % |
|-------|-----------------|-------|--------------|--------------|--------|
| 1     | 11.03           | 0.48  | 284.83       | 9515.12      | 98.73  |
| 2     | 18.39           | 0.66  | 2.35         | 122.06       | 1.27   |
| Total |                 |       |              | 9637.19      | 100.00 |

Figure 6 HPLC of (*R*)-2,4-diphenyl-1-*m*-tolylbutane-1,4-dione (**12c**).

AK Enders - Analytische HPLC

Sample Name: H 294 Rac  
 Data file: F:\BERT\HAN\294RIA.D  
 Sample Info: Laufmittel:n-Heptan/IP 9:1;  
 Probe im LM/DCM gelöst

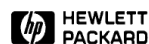

Säule: DAICELIA.M  
 Säuleninfo: (250 x 4.6)mm 10µ

Operator: Analytik Labor AKEN

Injektion Time: 09:32:24  
 Injektion Date: 23.11.2007

| Instrument Conditions: | At Start | At Stop |
|------------------------|----------|---------|
| Temperature in °C:     | 30.0     | 30.0    |
| Pressure in bar:       | 50.1     | 49.2    |
| Flow in ml/min:        | 1.0      | 1.0     |

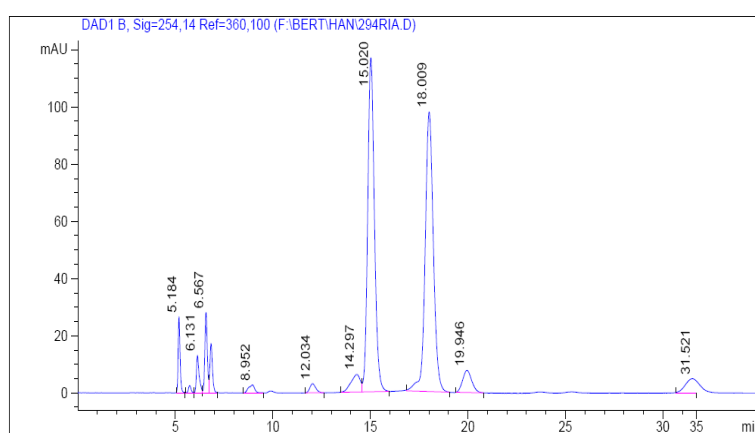

| #     | Ret. Time (min) | Width | Height (mAU) | Area (mAU*s) | Area % |
|-------|-----------------|-------|--------------|--------------|--------|
| 1     | 5.18            | 0.10  | 26.60        | 184.28       | 2.55   |
| 2     | 5.73            | 0.15  | 2.51         | 23.10        | 0.32   |
| 3     | 6.13            | 0.14  | 13.08        | 128.97       | 1.78   |
| 4     | 6.57            | 0.13  | 28.20        | 244.44       | 3.38   |
| 5     | 6.83            | 0.14  | 17.28        | 160.32       | 2.22   |
| 6     | 8.95            | 0.30  | 2.78         | 61.37        | 0.85   |
| 7     | 12.03           | 0.31  | 3.20         | 68.37        | 0.95   |
| 8     | 14.30           | 0.43  | 6.17         | 205.09       | 2.84   |
| 9     | 15.02           | 0.37  | 116.89       | 2784.40      | 38.49  |
| 10    | 18.01           | 0.45  | 97.81        | 2863.12      | 39.58  |
| 11    | 19.95           | 0.47  | 7.76         | 252.55       | 3.49   |
| 12    | 31.52           | 0.63  | 4.96         | 257.48       | 3.56   |
| Total |                 |       |              | 7233.48      | 100.00 |

Figure 7 HPLC of 1-(4-chlorophenyl)-2,4-diphenylbutane-1,4-dione (*rac*-12d).

AK Enders - Analytische HPLC

Sample Name: H 375  
 Data file: E:\BERT\HAN\375IA.D  
 Sample Info: Laufmittel:n-Heptan/IP 9:1;  
 Probe im LM gelöst

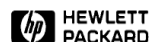

Säule: DAICELIA.M  
 Säuleninfo: (250 x 4.6)mm 10µ

Operator: Analytik Labor AKEN

Injektion Time: 14:04:47  
 Injektion Date: 06.02.2008

| Instrument Conditions: | At Start | At Stop |
|------------------------|----------|---------|
| Temperature in °C:     | 30.0     | 30.0    |
| Pressure in bar:       | 49.1     | 49.1    |
| Flow in ml/min:        | 1.0      | 1.0     |

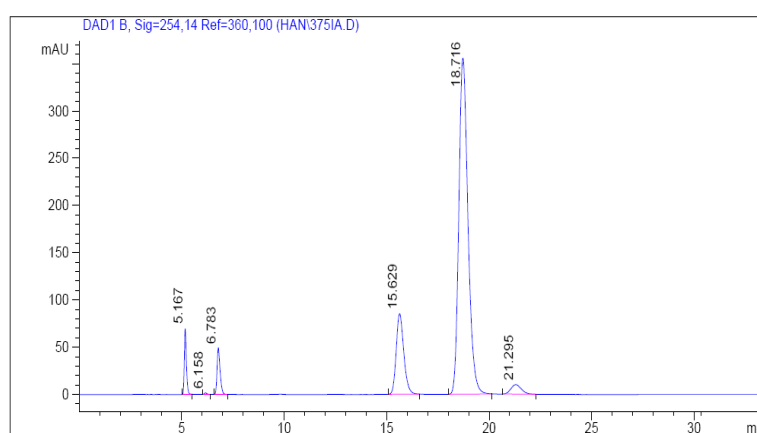

| #     | Ret. Time (min) | Width | Height (mAU) | Area (mAU*s) | Area % |
|-------|-----------------|-------|--------------|--------------|--------|
| 1     | 5.17            | 0.11  | 69.86        | 494.21       | 3.39   |
| 2     | 6.16            | 0.13  | 1.71         | 14.34        | 0.10   |
| 3     | 6.78            | 0.15  | 49.52        | 508.38       | 3.49   |
| 4     | 15.63           | 0.40  | 85.36        | 2191.35      | 15.03  |
| 5     | 18.72           | 0.47  | 355.85       | 11011.29     | 75.53  |
| 6     | 21.30           | 0.52  | 10.09        | 359.67       | 2.47   |
| Total |                 |       |              | 14579.25     | 100.00 |

Figure 8 HPLC of (*R*)-1-(4-chlorophenyl)-2,4-diphenylbutane-1,4-dione (**12d**).

AK Enders - Analytische HPLC

Sample Name: H 402 rac  
 Data file: E:\BERT\HAN\402RIA.D  
 Sample Info: Laufmittel:n-Heptan/IP 7:3;  
 Probe im LM gelöst

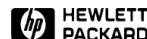

Säule: DAICELIA.M  
 Säuleninfo: (250 x 4.6) mm 10µ

Operator: Analytik Labor AKEN

Injektion Time: 13:48:53  
 Injektion Date: 25.02.2008

| Instrument Conditions: | At Start | At Stop |
|------------------------|----------|---------|
| Temperature in °C:     | 30.0     | 30.0    |
| Pressure in bar:       | 43.7     | 43.2    |
| Flow in ml/min:        | 0.7      | 0.7     |

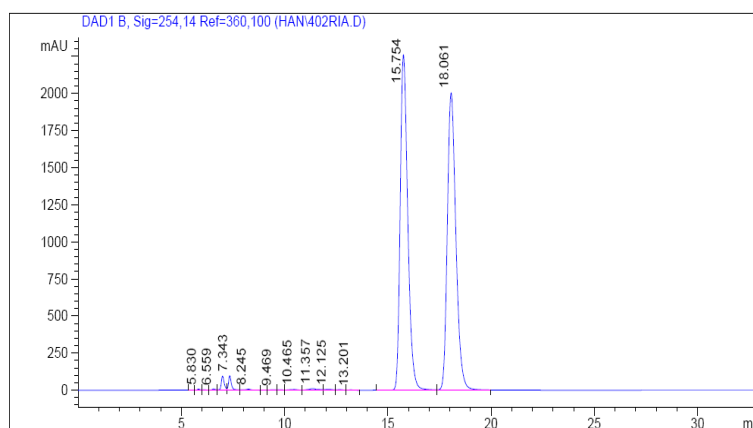

| #     | Ret. Time (min) | Width | Height (mAU) | Area (mAU*s) | Area % |
|-------|-----------------|-------|--------------|--------------|--------|
| 1     | 5.45            | 0.18  | 1.97         | 25.75        | 0.02   |
| 2     | 5.83            | 0.14  | 7.97         | 73.39        | 0.06   |
| 3     | 6.12            | 0.18  | 3.03         | 37.07        | 0.03   |
| 4     | 6.56            | 0.17  | 8.32         | 96.65        | 0.08   |
| 5     | 6.99            | 0.15  | 95.72        | 959.26       | 0.81   |
| 6     | 7.34            | 0.15  | 98.01        | 956.66       | 0.81   |
| 7     | 8.24            | 0.31  | 7.52         | 167.44       | 0.14   |
| 8     | 8.99            | 0.20  | 1.82         | 23.94        | 0.02   |
| 9     | 9.47            | 0.31  | 2.65         | 51.45        | 0.04   |
| 10    | 9.78            | 0.24  | 3.07         | 49.92        | 0.04   |
| 11    | 10.47           | 0.37  | 4.96         | 133.87       | 0.11   |
| 12    | 11.36           | 0.42  | 10.62        | 331.47       | 0.28   |
| 13    | 12.13           | 0.37  | 6.04         | 150.93       | 0.13   |
| 14    | 12.67           | 0.29  | 3.70         | 70.75        | 0.06   |
| 15    | 13.20           | 0.29  | 1.88         | 37.22        | 0.03   |
| 16    | 15.75           | 0.39  | 2261.28      | 57382.20     | 48.57  |
| 17    | 18.06           | 0.44  | 2004.09      | 57600.56     | 48.75  |
| Total |                 |       |              | 118148.54    | 100.00 |

Figure 9 HPLC of 1-(4-bromophenyl)-2,4-diphenylbutane-1,4-dione (*rac*-12e).



AK Enders - Analytische HPLC

Sample Name: H 403  
 Data file: E:\BERT\HAN\403IA.D  
 Sample Info: Laufmittel:n-Heptan/IP 7:3;  
 Probe im LM gelöst

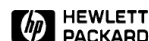

Säule: DAICELIA.M  
 Säuleninfo: (250 x 4.6) mm 10µ

Operator: Analytik Labor AKEN

Injektion Time: 14:25:31  
 Injektion Date: 25.02.2008

| Instrument Conditions: | At Start | At Stop |
|------------------------|----------|---------|
| Temperature in °C:     | 30.0     | 30.0    |
| Pressure in bar:       | 43.1     | 43.1    |
| Flow in ml/min:        | 0.7      | 0.7     |

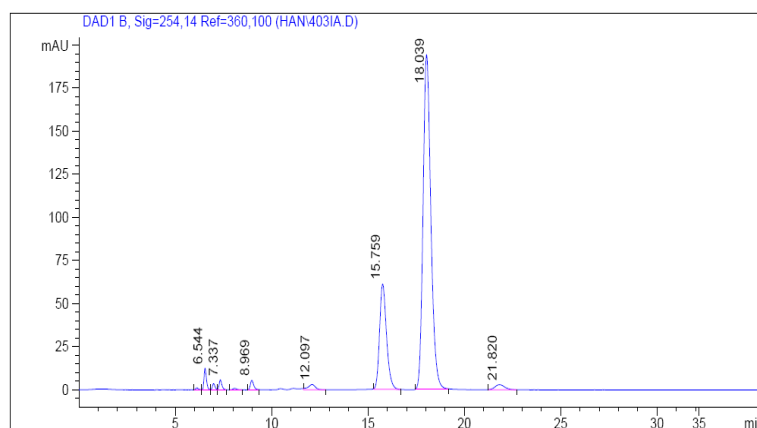

| #     | Ret. Time (min) | Width | Height (mAU) | Area (mAU*s) | Area % |
|-------|-----------------|-------|--------------|--------------|--------|
| 1     | 6.12            | 0.15  | 1.14         | 10.91        | 0.15   |
| 2     | 6.54            | 0.14  | 12.51        | 109.94       | 1.47   |
| 3     | 6.99            | 0.14  | 3.65         | 33.79        | 0.45   |
| 4     | 7.34            | 0.15  | 5.77         | 57.41        | 0.77   |
| 5     | 8.07            | 0.21  | 0.85         | 11.38        | 0.15   |
| 6     | 8.97            | 0.19  | 5.44         | 66.98        | 0.90   |
| 7     | 12.10           | 0.39  | 3.04         | 80.96        | 1.08   |
| 8     | 15.76           | 0.38  | 61.14        | 1532.88      | 20.54  |
| 9     | 18.04           | 0.43  | 194.17       | 5455.57      | 73.10  |
| 10    | 21.82           | 0.54  | 2.94         | 103.70       | 1.39   |
| Total |                 |       |              | 7463.51      | 100.00 |

Figure 10 HPLC of (R)-1-(4-bromophenyl)-2,4-diphenylbutane-1,4-dione (**12e**).

AK Enders - Analytische HPLC

Sample Name: H 358 rac  
Data file: F:\GONZO\HAN\358ROD.D  
Sample Info: Laufmittel: n-Heptan/IP 7:3;  
Probe im LM gelöst

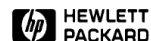

Säule: DAICELOD.M  
Säuleninfo: (250x4,6)mm  
Operator: Analytik Labor AKEN

->

Injektion Time: 15:26:30  
Injektion Date: 24.01.2008

Instrument Conditions: At Start At Stop  
Temperature in °C: 30.0°C 30.0°C  
Pressure in bar: 25.4 26.1  
Flow in ml/min: 0.7 0.7

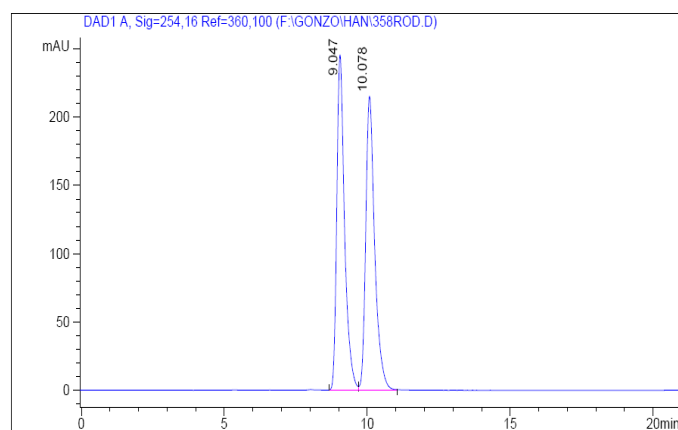

| #     | Ret. Time (min) | Width | Height (mAU) | Area (mAU*s) | Area % |
|-------|-----------------|-------|--------------|--------------|--------|
| 1     | 9.05            | 0.28  | 245.55       | 4646.98      | 49.79  |
| 2     | 10.08           | 0.33  | 215.18       | 4686.45      | 50.21  |
| Total |                 |       |              | 9333.43      | 100.00 |

Figure 11 HPLC of 1-(naphthalen-2-yl)-2,4-diphenylbutane-1,4-dione (*rac*-12f).

AK Enders - Analytische HPLC

Sample Name: H 365  
Data file: F:\GONZO\HAN\365OD.D  
Sample Info: Laufmittel: n-Heptan/IP 7:3;  
Probe im LM gelöst

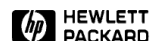

Säule: DAICELOD.M  
Säuleninfo: (250x4,6)mm  
Operator: Analytik Labor AKEN

->

Injektion Time: 14:25:23  
Injektion Date: 28.01.2008

Instrument Conditions: At Start At Stop  
Temperature in °C: 30.0°C 30.0°C  
Pressure in bar: 25.5 25.9  
Flow in ml/min: 0.7 0.7

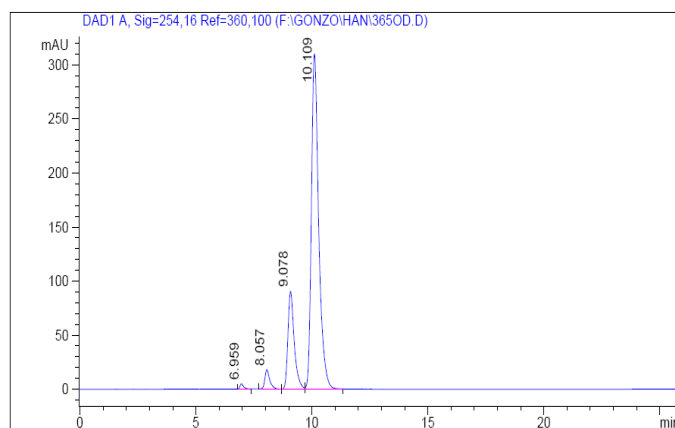

| #     | Ret. Time (min) | Width | Height (mAU) | Area (mAU*s) | Area % |
|-------|-----------------|-------|--------------|--------------|--------|
| 1     | 6.96            | 0.17  | 4.96         | 57.59        | 0.65   |
| 2     | 8.06            | 0.22  | 17.98        | 267.83       | 3.04   |
| 3     | 9.08            | 0.28  | 90.37        | 1705.13      | 19.37  |
| 4     | 10.11           | 0.33  | 310.19       | 6770.98      | 76.93  |
| Total |                 |       |              | 8801.53      | 100.00 |

Figure 12 HPLC of (R)-1-(naphthalen-2-yl)-2,4-diphenylbutane-1,4-dione (**12f**).

AK Enders - Analytische HPLC

Sample Name: H 415 rac  
 Data file: E:\BERT\HAN\415RIA.D  
 Sample Info: Laufmittel:n-Heptan/IP 6:4;  
 Probe im LM gelöst

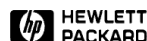

Säule: DAICELIA.M  
 Säuleninfo: (250 x 4.6)mm 10µ

Operator: Analytik Labor AKEN

Injektion Time: 08:59:44  
 Injektion Date: 07.03.2008

Instrument Conditions: At Start At Stop

Temperature in °C: 30.0 30.0  
 Pressure in bar: 51.6 51.3  
 Flow in ml/min: 0.7 0.7

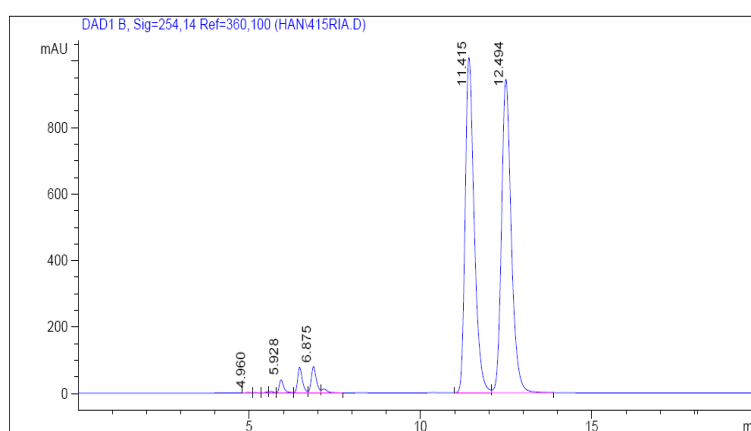

| #     | Ret. Time (min) | Width | Height (mAU) | Area (mAU*s) | Area % |
|-------|-----------------|-------|--------------|--------------|--------|
| 1     | 4.96            | 0.17  | 1.91         | 20.77        | 0.05   |
| 2     | 5.19            | 0.13  | 1.58         | 14.99        | 0.04   |
| 3     | 5.53            | 0.10  | 3.94         | 26.29        | 0.07   |
| 4     | 5.64            | 0.12  | 5.14         | 42.96        | 0.11   |
| 5     | 5.93            | 0.14  | 40.17        | 374.85       | 0.95   |
| 6     | 6.47            | 0.14  | 77.86        | 749.65       | 1.90   |
| 7     | 6.88            | 0.16  | 80.03        | 826.77       | 2.10   |
| 8     | 7.18            | 0.18  | 12.54        | 157.36       | 0.40   |
| 9     | 11.42           | 0.28  | 1009.78      | 18481.18     | 46.88  |
| 10    | 12.49           | 0.30  | 944.14       | 18727.39     | 47.50  |
| Total |                 |       |              | 39422.21     | 100.00 |

Figure 13 HPLC of 1-(furan-2-yl)-2,4-diphenylbutane-1,4-dione (*rac*-12g).

AK Enders - Analytische HPLC

Sample Name: Han 418  
Data file: E:\BERT\HAN\418IA.D  
Sample Info: Laufmittel:n-Heptan/IP 6:4;  
Probe im LM gelöst

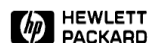

Säule: DAICELIA.M  
Säuleninfo: (250 x 4.6)mm 10µ

Operator: Analytik Labor AKEN

Injektion Time: 11:14:15  
Injektion Date: 07.03.2008

Instrument Conditions: At Start At Stop

Temperature in °C: 30.0 30.0  
Pressure in bar: 51.1 51.0  
Flow in ml/min: 0.7 0.7

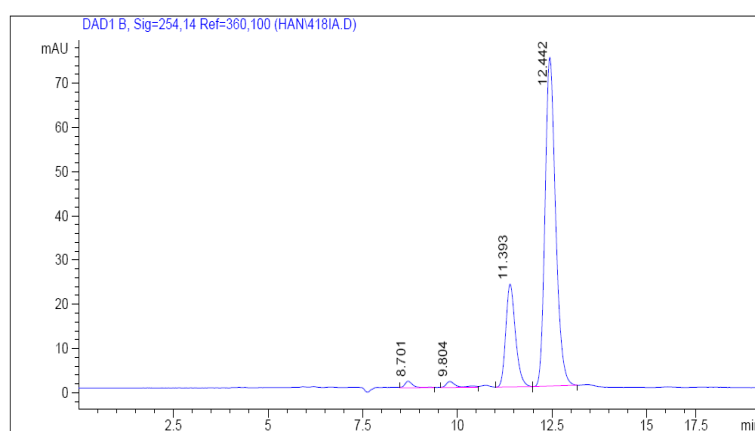

| #     | Ret. Time (min) | Width | Height (mAU) | Area (mAU*s) | Area % |
|-------|-----------------|-------|--------------|--------------|--------|
| 1     | 8.70            | 0.21  | 1.50         | 23.19        | 1.22   |
| 2     | 9.80            | 0.28  | 1.36         | 27.42        | 1.44   |
| 3     | 11.39           | 0.28  | 23.26        | 413.29       | 21.73  |
| 4     | 12.44           | 0.29  | 74.34        | 1437.65      | 75.60  |
| Total |                 |       |              | 1901.56      | 100.00 |

Figure 14 HPLC of (*R*)-1-(furan-2-yl)-2,4-diphenylbutane-1,4-dione (**12g**).

AK Enders - Analytische HPLC

Sample Name: H 377 rac  
 Data file: D:\GONZO\HAN\377RW.D  
 Sample Info: Laufmittel: n-Heptan/IP 7:3;  
 Probe im LM gelöst

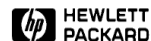

Säule: WHELK.M  
 Säuleninfo: (250x4,6)mm  
 Operator: Analytik Labor AKEN

->

Injektion Time: 13:12:54  
 Injektion Date: 07.02.2008

Instrument Conditions: At Start At Stop  
 Temperature in °C: 30.0 °C 30.0 °C  
 Pressure in bar: 42.9 44.7  
 Flow in ml/min: 0.7 0.7

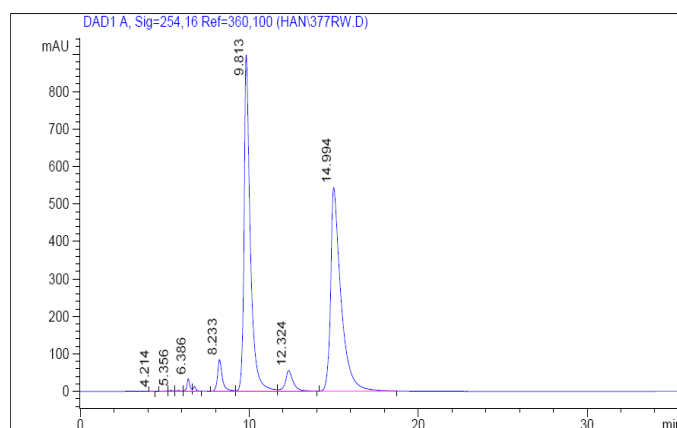

| #     | Ret. Time (min) | Width | Height (mAU) | Area (mAU*s) | Area % |
|-------|-----------------|-------|--------------|--------------|--------|
| 1     | 4.21            | 0.11  | 1.05         | 7.75         | 0.02   |
| 2     | 5.06            | 0.20  | 1.15         | 16.64        | 0.03   |
| 3     | 5.36            | 0.19  | 2.75         | 37.51        | 0.07   |
| 4     | 5.79            | 0.26  | 2.32         | 42.85        | 0.09   |
| 5     | 6.39            | 0.18  | 34.08        | 410.21       | 0.82   |
| 6     | 6.75            | 0.18  | 12.89        | 158.17       | 0.31   |
| 7     | 8.23            | 0.29  | 84.60        | 1695.58      | 3.37   |
| 8     | 9.81            | 0.37  | 897.44       | 23008.57     | 45.78  |
| 9     | 12.32           | 0.46  | 55.47        | 1790.91      | 3.56   |
| 10    | 14.99           | 0.60  | 543.67       | 23095.53     | 45.95  |
| Total |                 |       |              | 50263.73     | 100.00 |

Figure 15 HPLC of 2-(4-chlorophenyl)-1,4-diphenylbutane-1,4-dione (*rac*-12i).

AK Enders - Analytische HPLC

Sample Name: HR 497  
Data file: D:\GONZO\HAN\HR497W.D  
Sample Info: Laufmittel: n-Heptan/IP 7:3;  
Probe im LM gelöst

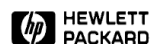

->

Säule: WHELK.M  
Säuleninfo: (250x4,6)mm  
Operator: Analytik Labor AKEN

Injektion Time: 11:57:30  
Injektion Date: 21.05.2008

Instrument Conditions: At Start At Stop  
Temperature in °C: 30.0°C 30.0°C  
Pressure in bar: 41.8 42.5  
Flow in ml/min: 0.7 0.7

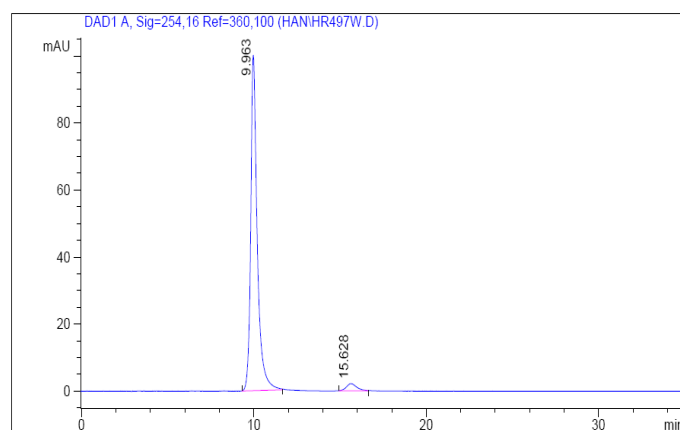

| #     | Ret. Time (min) | Width | Height (mAU) | Area (mAU*s) | Area % |
|-------|-----------------|-------|--------------|--------------|--------|
| 1     | 9.96            | 0.38  | 100.13       | 2626.33      | 96.62  |
| 2     | 15.63           | 0.55  | 2.17         | 91.95        | 3.38   |
| Total |                 |       |              | 2718.28      | 100.00 |

Figure 16 HPLC of (R)-2-(4-chlorophenyl)-1,4-diphenylbutane-1,4-dione (**12i**).

AK Enders - Analytische HPLC

Sample Name: FT 207 Fl rac  
 Data file: D:\GONZO\FT\207RW.D  
 Sample Info: Laufmittel: n-Heptan/IP 7:3;  
 Probe im LM gelöst

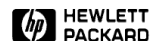

Säule: WHELK.M  
 Säuleninfo: (250x4,6)mm  
 Operator: Analytik Labor AKEN

->

Injektion Time: 08:54:35  
 Injektion Date: 08.02.2008

Instrument Conditions: At Start At Stop  
 Temperature in °C: 30.0 °C 30.0 °C  
 Pressure in bar: 44.4 45.1  
 Flow in ml/min: 0.7 0.7

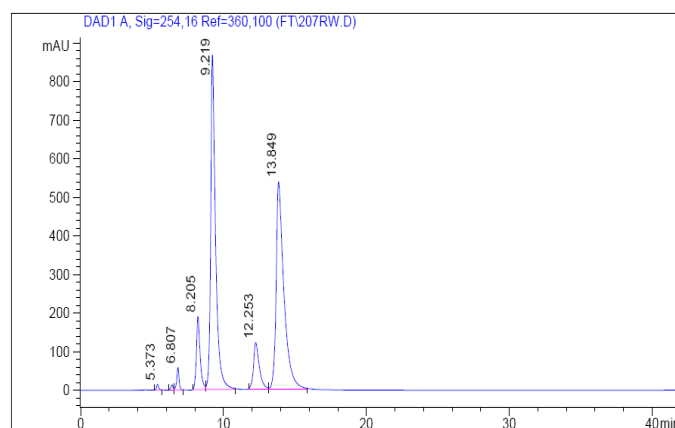

| #     | Ret. Time (min) | Width | Height (mAU) | Area (mAU*s) | Area % |
|-------|-----------------|-------|--------------|--------------|--------|
| 1     | 5.37            | 0.16  | 14.67        | 151.62       | 0.31   |
| 2     | 6.39            | 0.17  | 12.86        | 140.10       | 0.29   |
| 3     | 6.81            | 0.17  | 57.87        | 641.01       | 1.32   |
| 4     | 8.21            | 0.27  | 189.45       | 3448.10      | 7.09   |
| 5     | 9.22            | 0.34  | 866.40       | 20418.68     | 41.99  |
| 6     | 12.25           | 0.42  | 120.50       | 3442.69      | 7.08   |
| 7     | 13.85           | 0.54  | 537.83       | 20379.98     | 41.91  |
| Total |                 |       |              | 48622.19     | 100.00 |

Figure 17 HPLC of 1,4-diphenyl-2-p-tolylbutane-1,4-dione (*rac*-12h).



AK Enders - Analytische HPLC

Sample Name: H 497  
 Data file: D:\GONZO\HAN\497W.D  
 Sample Info: Laufmittel: n-Heptan/IP 7:3  
 Probe im LM gelöst

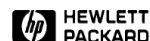

Säule: WHELK.M  
 Säuleninfo: (250x4,6)mm  
 Operator: Analytik Labor AKEN

Injektion Time: 12:26:17  
 Injektion Date: 15.05.2008

Instrument Conditions: At Start At Stop  
 Temperature in °C: 30.0°C 30.0°C  
 Pressure in bar: 41.5 42.1  
 Flow in ml/min: 0.7 0.7

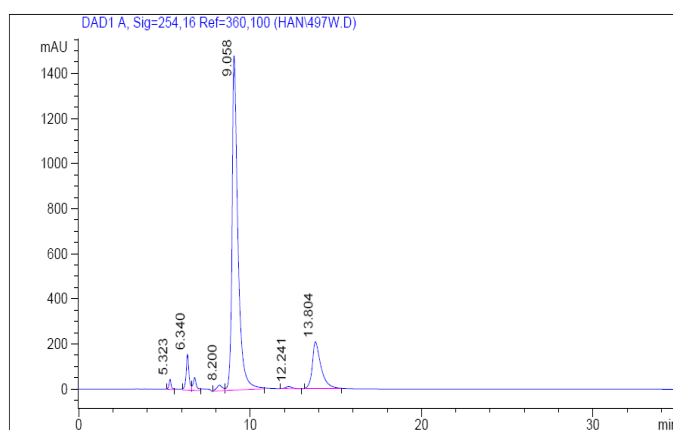

| #     | Ret. Time (min) | Width | Height (mAU) | Area (mAU*s) | Area % |
|-------|-----------------|-------|--------------|--------------|--------|
| 1     | 5.32            | 0.13  | 45.23        | 405.22       | 0.87   |
| 2     | 6.34            | 0.18  | 159.31       | 1846.98      | 3.97   |
| 3     | 6.76            | 0.20  | 56.94        | 788.03       | 1.69   |
| 4     | 8.20            | 0.33  | 25.12        | 582.94       | 1.25   |
| 5     | 9.06            | 0.35  | 1482.80      | 35279.33     | 75.81  |
| 6     | 12.24           | 0.40  | 8.92         | 234.40       | 0.50   |
| 7     | 13.80           | 0.52  | 207.82       | 7399.40      | 15.90  |
| Total |                 |       |              | 46536.31     | 100.00 |

Figure 18 HPLC of (R)-1,4-diphenyl-2-p-tolylbutane-1,4-dione (**12h**).

## References

- [1] M. Jayamani, N. Pant, S. Ananthan, K. Narayanan and C. N. Pillai, *Tetrahedron*. **1986**, *42*, 4325.
- [2] R. L. Grob, in *Modern Practice of Gas Chromatography*, ed. R. L. Grob and E. F. Barry, John Wiley & Sons, Inc.-Wiley-Interscience, New York, 4th edn., 2004.
- [3] W. L. F. Armarego and C. L. L. Chai, in *Purification of Laboratory Chemicals*, Elsevier, 5th edn., 2003.
- [4] M. Hashimoto, M. Matsumoto and S. Terashima, *Tetrahedron*. **2003**, *59*, 3019.
- [5] a) H. Stetter and H. Kuhlmann, *Chem. Ber.* **1976**, *109*, 2890; b) A. E. Mattson, A. R. Bharadwaj and K. A. Scheidt, *J. Am. Chem. Soc.* **2004**, *126*, 2314.
